# Supplementary material for: Monocyte distribution width as a novel sepsis indicator in COVID-19 patients
Source: Springer Nature journal article supplement (doi:10.1186/s12879-021-07016-4), 2022-01-04
Supplement: MOESM1 [file 19999330]

## COVID-19 CORE CASE REPORT FORM

### ACUTE RESPIRATORY INFECTION CLINICAL CHARACTERISATION DATA TOOL

#### DESIGN OF THIS CASE REPORT FORM (CRF)

This CRF is set up in modules to be used for recording data on the ISARIC\_nCov Core Database or for independent studies.

**Module 1 and Module 2** complete on the first day of presentation/admission or on first day of COVID-19 assessment.  
**Module 2** also complete on first day of admission to ICU or high dependency unit. In addition, complete daily for as many days as resources allow up to a maximum of 14 days. Continue to follow-up patients who transfer between wards.  
**Module 3 (Outcome)** complete at discharge or death

#### GENERAL GUIDANCE

- The CRF is designed to collect data obtained through examination, interview and review of hospital notes. Data may be collected prospectively or retrospectively if the patient is enrolled after the admission date.
- Participant Identification Numbers consist of a 5 digit site code and a 4 digit participant number. You can obtain a site code and registering on the data management system by contacting [ncov@isaric.org](mailto:ncov@isaric.org). Participant numbers should be assigned sequentially for each site beginning with 0001. In the case of a single site recruiting participants on different wards, or where it is otherwise difficult to assign sequential numbers, it is acceptable to assign numbers in blocks or incorporating alpha characters. E.g. Ward X will assign numbers from 0001 or A001 onwards and Ward Y will assign numbers from 5001 or B001 onwards. Enter the Participant Identification Number at the top of every page.
- Printed paper CRFs may be used for later transfer of the data onto the electronic database.
- For participants who return for re-admission to the same site, **start a new form with the same Participant Identification Number**. Please check “YES-admitted previously” in the ONSET & ADMISSION section. Enter as 2 separate entries in the electronic database.
- For participants who transfer between two sites that are both collecting data on this form, it is preferred to have the data entered 2 by a single site as a single admission, under the same Participant Identification Number. When this is not possible, the first site should record “Transfer to other facility” as an OUTCOME, and the second site should start a new form with a new patient number and indicate “YES-transferred” in ONSET & ADMISSION.
- Complete every line of every section, except where the instructions say to skip a section based on a response.
- Selections with circles (●) are single selection answers (choose one answer only). Selections with square boxes (□) are multiple selection answers (choose as many answers as are applicable).
- Mark ‘Not done’ for any results of laboratory values that are not available, not applicable or unknown.
- Avoid recording data outside of the dedicated areas. Sections are available for recording additional information.
- If using paper CRFs, we recommend writing clearly in ink, using BLOCK-CAPITAL LETTERS.
- Place an (X) when you choose the corresponding answer. To make corrections, strike through (-----) the data you wish to delete and write the correct data above it. Please initial and date all corrections.
- Please keep all of the sheets for a single participant together e.g. with a staple or participant-unique folder.
- Please transfer all paper CRF data to the electronic database. All paper CRFs needs to be stored locally, do not send any forms to us. Data are accepted only via secure electronic database.
- Please enter data on the electronic data capture system at <https://ncov.medsci.ox.ac.uk/>. If your site would like to collect data independently, we are happy to support the establishment of locally hosted databases.
- Please contact us at [ncov@isaric.org](mailto:ncov@isaric.org) if you need help with databases, if you have comments and to let us know that you are using the forms.

## MODULE 1: PRESENTATION/ADMISSION CASE REPORT FORM

### CLINICAL INCLUSION CRITERIA

Suspected or confirmed novel coronavirus (COVID-19) infection:  YES  NO

### DEMOGRAPHICS

Clinical centre name: \_\_\_\_\_ Country: \_\_\_\_\_

Enrolment date /first COVID-19 assessment date: [ \_ ][ \_ ][ \_ ]/[ \_ M ][ \_ M ]/[ \_ 2 ][ \_ 0 ][ \_ Y ][ \_ Y ]

Ethnic group (check all that apply):  Arab  Black  East Asian  South Asian  West Asian  Latin American  White

Aboriginal/First Nations  Other: \_\_\_\_\_  Unknown

Employed as a Healthcare Worker?  YES  NO  Unknown Employed in a microbiology laboratory?  YES  NO  Unknown

Sex at Birth:  Male  Female  Not specified/Unknown Age [ \_ ][ \_ ][ \_ ]years OR [ \_ ][ \_ ]months

Pregnant?  YES  NO  Unknown If YES: Gestational weeks assessment: [ \_ ][ \_ ] weeks

POST PARTUM?  YES  NO  Unknown (if NO or Unknown skip this section)

Pregnancy Outcome:  Live birth  Still birth Delivery date: [ \_ ][ \_ ][ \_ ]/[ \_ M ][ \_ M ]/[ \_ 2 ][ \_ 0 ][ \_ Y ][ \_ Y ]

Baby tested for COVID-19/SARS-CoV-2 infection?  YES  NO  Unknown

If YES, result of test:  Positive  Negative  Unknown (If Positive, complete a separate CRF for baby)

INFANT – Less than 1 year old?  YES  NO (If NO skip this section)

Birth weight: [ \_ ][ \_ ].[ \_ ]kg or  lbs  Unknown

Gestational outcome:  Term birth ( $\geq 37$ wk GA)  Preterm birth ( $< 37$ wk GA)  Unknown

Breastfed?  YES-currently breastfeeding  YES-breastfeeding discontinued  NO  Unknown

Vaccinations appropriate for age/country?  YES  NO  Unknown

### ONSET & ADMISSION

Onset date of first/earliest symptom: [ \_ ][ \_ ][ \_ ]/[ \_ M ][ \_ M ]/[ \_ 2 ][ \_ 0 ][ \_ Y ][ \_ Y ]

Most recent presentation/admission date at this facility: [ \_ ][ \_ ][ \_ ]/[ \_ M ][ \_ M ]/[ \_ 2 ][ \_ 0 ][ \_ Y ][ \_ Y ]

Was the patient admitted previously or transferred from any other facility during this illness episode?

YES-admitted previously to this facility  YES-transferred from other facility  NO  Unknown

### SIGNS AND SYMPTOMS AT HOSPITAL ADMISSION (first available data at presentation/admission – within 24 hours)

Temperature: [ \_ ][ \_ ][ \_ ].[ \_ ]°C or  °F

HR: [ \_ ][ \_ ][ \_ ]beats per minute

RR: [ \_ ][ \_ ]breaths per minute

Systolic BP: [ \_ ][ \_ ][ \_ ]mmHg Diastolic BP: [ \_ ][ \_ ][ \_ ]mmHg

Oxygen saturation: [ \_ ][ \_ ][ \_ ]% On:  Room air  Oxygen therapy  Unknown

Sternal capillary refill time >2sec.  YES  NO  Unknown

Height: [ \_ ][ \_ ][ \_ ]cm

Weight: [ \_ ][ \_ ][ \_ ]kg

**MODULE 1: PRESENTATION/ADMISSION CASE REPORT FORM**

| <b>SIGNS AND SYMPTOMS ON ADMISSION</b> ( <i>Unk = Unknown</i> ) |                                                                                               |                                                    |                                                                              |
|-----------------------------------------------------------------|-----------------------------------------------------------------------------------------------|----------------------------------------------------|------------------------------------------------------------------------------|
| History of fever                                                | <input type="radio"/> YES <input type="radio"/> NO <input type="radio"/> Unk                  | Fatigue / Malaise                                  | <input type="radio"/> YES <input type="radio"/> NO <input type="radio"/> Unk |
| Cough                                                           | <input type="radio"/> YES-non-productive <input type="radio"/> YES-productive                 | Anorexia                                           | <input type="radio"/> YES <input type="radio"/> NO <input type="radio"/> Unk |
|                                                                 | <input type="radio"/> YES-with haemoptysis <input type="radio"/> NO <input type="radio"/> Unk | Altered consciousness/confusion                    | <input type="radio"/> YES <input type="radio"/> NO <input type="radio"/> Unk |
| Sore throat                                                     | <input type="radio"/> YES <input type="radio"/> NO <input type="radio"/> Unk                  | Muscle aches (myalgia)                             | <input type="radio"/> YES <input type="radio"/> NO <input type="radio"/> Unk |
| Runny nose (rhinorrhoea)                                        | <input type="radio"/> YES <input type="radio"/> NO <input type="radio"/> Unk                  | Joint pain (arthralgia)                            | <input type="radio"/> YES <input type="radio"/> NO <input type="radio"/> Unk |
| Wheezing                                                        | <input type="radio"/> YES <input type="radio"/> NO <input type="radio"/> Unk                  | Inability to walk                                  | <input type="radio"/> YES <input type="radio"/> NO <input type="radio"/> Unk |
| Shortness of breath                                             | <input type="radio"/> YES <input type="radio"/> NO <input type="radio"/> Unk                  | Abdominal pain                                     | <input type="radio"/> YES <input type="radio"/> NO <input type="radio"/> Unk |
| Lower chest wall indrawing                                      | <input type="radio"/> YES <input type="radio"/> NO <input type="radio"/> Unk                  | Diarrhoea                                          | <input type="radio"/> YES <input type="radio"/> NO <input type="radio"/> Unk |
| Chest pain                                                      | <input type="radio"/> YES <input type="radio"/> NO <input type="radio"/> Unk                  | Vomiting / Nausea                                  | <input type="radio"/> YES <input type="radio"/> NO <input type="radio"/> Unk |
| Conjunctivitis                                                  | <input type="radio"/> YES <input type="radio"/> NO <input type="radio"/> Unk                  | Skin rash                                          | <input type="radio"/> YES <input type="radio"/> NO <input type="radio"/> Unk |
| Lymphadenopathy                                                 | <input type="radio"/> YES <input type="radio"/> NO <input type="radio"/> Unk                  | Bleeding (Haemorrhage)<br>If YES, specify site(s): | <input type="radio"/> YES <input type="radio"/> NO <input type="radio"/> Unk |
| Headache                                                        | <input type="radio"/> YES <input type="radio"/> NO <input type="radio"/> Unk                  |                                                    |                                                                              |
| Loss of smell (Anosmia)                                         | <input type="radio"/> YES <input type="radio"/> NO <input type="radio"/> Unk                  | Other symptom(s)<br>If YES, specify:               | <input type="radio"/> YES <input type="radio"/> NO <input type="radio"/> Unk |
| Loss of taste (Ageusia)                                         | <input type="radio"/> YES <input type="radio"/> NO <input type="radio"/> Unk                  |                                                    |                                                                              |
| Seizures                                                        | <input type="radio"/> YES <input type="radio"/> NO <input type="radio"/> Unk                  |                                                    |                                                                              |

| <b>PRE-ADMISSION MEDICATION</b> ( <i>taken within 14 days of admission/presentation at healthcare facility</i> ) |                                                                                                |
|------------------------------------------------------------------------------------------------------------------|------------------------------------------------------------------------------------------------|
| Angiotensin converting enzyme inhibitors (ACE inhibitors)                                                        | <input type="radio"/> YES <input type="radio"/> NO <input type="radio"/> Unk                   |
| Angiotensin II receptor blockers (ARBs)                                                                          | <input type="radio"/> YES <input type="radio"/> NO <input type="radio"/> Unk                   |
| Non-steroidal anti-inflammatory (NSAIDs)                                                                         | <input type="radio"/> YES <input type="radio"/> NO <input type="radio"/> Unk                   |
| Oral steroids                                                                                                    | <input type="radio"/> YES <input type="radio"/> NO <input type="radio"/> Unk If YES, agent(s): |
| Other immunosuppressant agents (not oral steroids)                                                               | <input type="radio"/> YES <input type="radio"/> NO <input type="radio"/> Unk If YES, agent(s): |
| Antivirals                                                                                                       | <input type="radio"/> YES <input type="radio"/> NO <input type="radio"/> Unk If YES, agent(s): |
| Antibiotics                                                                                                      | <input type="radio"/> YES <input type="radio"/> NO <input type="radio"/> Unk If YES, agent(s): |
| Other targeted COVID-19 Medications                                                                              | <input type="radio"/> YES <input type="radio"/> NO <input type="radio"/> Unk If YES, agent(s): |

| <b>CO-MORBIDITIES AND RISK FACTORS</b> ( <i>existing prior to admission and ongoing</i> ) |                                                                              |                                                   |                                                                                                                            |
|-------------------------------------------------------------------------------------------|------------------------------------------------------------------------------|---------------------------------------------------|----------------------------------------------------------------------------------------------------------------------------|
| Chronic cardiac disease ( <i>not hypertension</i> )                                       | <input type="radio"/> YES <input type="radio"/> NO <input type="radio"/> Unk | Chronic hematologic disease                       | <input type="radio"/> YES <input type="radio"/> NO <input type="radio"/> Unk                                               |
| Hypertension                                                                              | <input type="radio"/> YES <input type="radio"/> NO <input type="radio"/> Unk | AIDS / HIV                                        | <input type="radio"/> YES-on ART <input type="radio"/> YES-not on ART <input type="radio"/> NO <input type="radio"/> Unk   |
| Chronic pulmonary disease ( <i>not asthma</i> )                                           | <input type="radio"/> YES <input type="radio"/> NO <input type="radio"/> Unk | Diabetes Mellitus                                 | <input type="radio"/> YES-Type 1 <input type="radio"/> YES -Type 2 <input type="radio"/> NO <input type="radio"/> Unk      |
| Asthma ( <i>physician diagnosed</i> )                                                     | <input type="radio"/> YES <input type="radio"/> NO <input type="radio"/> Unk | Rheumatologic disorder                            | <input type="radio"/> YES <input type="radio"/> NO <input type="radio"/> Unk                                               |
| Chronic kidney disease                                                                    | <input type="radio"/> YES <input type="radio"/> NO <input type="radio"/> Unk | Dementia                                          | <input type="radio"/> YES <input type="radio"/> NO <input type="radio"/> Unk                                               |
| Obesity ( <i>as defined by clinical staff</i> )                                           | <input type="radio"/> YES <input type="radio"/> NO <input type="radio"/> Unk | Tuberculosis                                      | <input type="radio"/> YES <input type="radio"/> NO <input type="radio"/> Unk                                               |
| Moderate or severe liver disease                                                          | <input type="radio"/> YES <input type="radio"/> NO <input type="radio"/> Unk | Malnutrition                                      | <input type="radio"/> YES <input type="radio"/> NO <input type="radio"/> Unk                                               |
| Mild liver disease                                                                        | <input type="radio"/> YES <input type="radio"/> NO <input type="radio"/> Unk | Smoking                                           | <input type="radio"/> YES <input type="radio"/> Never smoked <input type="radio"/> Former smoker <input type="radio"/> Unk |
| Asplenia                                                                                  | <input type="radio"/> YES <input type="radio"/> NO <input type="radio"/> Unk | Other relevant risk factor(s)<br>If YES, specify: | <input type="radio"/> YES <input type="radio"/> NO <input type="radio"/> Unk                                               |
| Chronic neurological disorder                                                             | <input type="radio"/> YES <input type="radio"/> NO <input type="radio"/> Unk |                                                   |                                                                                                                            |
| Malignant neoplasm                                                                        | <input type="radio"/> YES <input type="radio"/> NO <input type="radio"/> Unk |                                                   |                                                                                                                            |

## MODULE 2: DAILY CASE REPORT FORM

Complete on the day of admission or first COVID-19 investigation, and on the first day of ICU admission (if different from day of admission). In addition, depending on available resources, complete every day for a maximum of 14 days, or for days when biochemical results are available.

### SIGNS AND SYMPTOMS (Record the worst value between 00:00 to 24:00 on day of assessment)(worst=furthest from normal range)

DATE OF ASSESSMENT (DD/MM/YYYY): [ \_ ] [ \_ ] [ \_ ] / [ \_ ] [ \_ ] [ \_ ] / [ \_ 2 ] [ \_ 0 ] [ \_ Y ] [ \_ Y ]

Temperature: [ ][ ][ ] °C or [ ][ ][ ] °F    HR: [ ][ ][ ] beats per minute    RR: [ ][ ][ ] breaths per minute

Systolic BP: [ ][ ][ ] mmHg    Diastolic BP: [ ][ ][ ] mmHg    Oxygen saturation SaO<sub>2</sub> [ ][ ][ ] %

Any supplemental oxygen: FiO<sub>2</sub> (0.21-1.0) [ ][ ][ ] or [ ][ ][ ] % or [ ][ ][ ] L/min

Sternal capillary refill time >2seconds     YES     NO     Unknown

AVPU: Alert [ ][ ] Verbal [ ][ ] Pain [ ][ ] Unresponsive [ ][ ]    Glasgow Coma Score (GCS / 15) [ ][ ][ ]

### Is the patient currently receiving, or has received (between 00:00 to 24:00 on day of assessment)

High-flow nasal cannula oxygen therapy?     YES     NO     Unknown

Non-invasive ventilation (Any)?     YES     NO     Unknown    If YES:  BIPAP     CPAP     Other     Unknown

Invasive ventilation?     YES     NO     Unknown

Prone positioning?     YES     NO     Unknown

Inhaled Nitric Oxide?     YES     NO     Unknown

Tracheostomy inserted?     YES     NO     Unknown

Extra corporeal life support (ECLS/ ECMO)?     YES     NO     Unknown    If YES:  VV     AV     Central     Unknown

Renal replacement therapy (RRT) or dialysis?     YES     NO     Unknown

Any vasopressor/inotropic support?     YES     NO     Unknown (if NO, select NO for the next 3 questions)

Dopamine <5µg/kg/min OR Dobutamine OR milrinone OR levosimendan:     YES     NO

Dopamine 5-15µg/kg/min OR Epinephrine/Norepinephrine < 0.1µg/kg/min OR vasopressin OR phenylephrine:     YES     NO

Dopamine >15µg/kg/min OR Epinephrine/Norepinephrine > 0.1µg/kg/min:     YES     NO

Neuromuscular blocking agents?     YES     NO     Unknown

Other intervention(s) or procedure(s)?     YES     NO     Unknown    If YES, Specify: \_\_\_\_\_

Current admission to ICU/ITU/IMC/HDU?     YES     NO     Unknown    (Record the worst value on day of assessment)

PaO<sub>2</sub> (at time nearest to the FiO<sub>2</sub> recorded at top of page) [ ][ ][ ] kPa or [ ][ ][ ] mmHg     Not done

PaO<sub>2</sub> sample type:     Arterial     Capillary     Unknown

From same blood gas record as PaO<sub>2</sub>:

PCO<sub>2</sub> \_\_\_\_\_ kPa or \_\_\_\_\_ mmHg | pH \_\_\_\_\_ | HCO<sub>3</sub><sup>-</sup> \_\_\_\_\_ mEq/L | Base excess \_\_\_\_\_ mmol/L

Richmond Agitation-Sedation Scale (RASS) [ ][ ] or Riker Sedation-Agitation Scale (SAS) [ ][ ]     Unknown

Mean Arterial Blood Pressure [ ][ ][ ] mmHg     Unknown

Urine flow rate [ ][ ][ ][ ][ ][ ] mL/24 hours     Check if estimated     Unknown

## MODULE 2: DAILY CASE REPORT FORM

Complete on the day of admission or first COVID-19 investigation, and on the first day of ICU admission (if different from day of admission). In addition, depending on available resources, complete every day for a maximum of 14 days, or for days when biochemical results are available.

**LABORATORY RESULTS (on admission, on any admission to ICU, then daily) – complete every line**
**DATE OF ASSESSMENT (DD/MM/YYYY):** [ \_D\_ ][ \_D\_ ]/[ \_M\_ ][ \_M\_ ]/[ \_2\_ ][ \_0\_ ][ \_Y\_ ][ \_Y\_ ]

Record the worst value between 00:00 to 24:00 on day of assessment (if Not Available write 'N/A'):

**LABORATORY RESULTS** (\*record units if different from those listed)

| Parameter                             | Value* | Not done              | Parameter             | Value* | Not done              |
|---------------------------------------|--------|-----------------------|-----------------------|--------|-----------------------|
| Haemoglobin (g/L)                     |        | <input type="radio"/> | Urea (BUN) (mmol/L)   |        | <input type="radio"/> |
| WBC count (x10 <sup>9</sup> /L)       |        | <input type="radio"/> | Lactate (mmol/L)      |        | <input type="radio"/> |
| Lymphocyte count (10 <sup>9</sup> /L) |        | <input type="radio"/> | Creatinine (µmol/L)   |        | <input type="radio"/> |
| Neutrophil count (10 <sup>9</sup> /L) |        | <input type="radio"/> | Sodium (mmol/L)       |        | <input type="radio"/> |
| Haematocrit (%)                       |        | <input type="radio"/> | Potassium (mmol/L)    |        | <input type="radio"/> |
| Platelets (x10 <sup>9</sup> /L)       |        | <input type="radio"/> | Procalcitonin (ng/mL) |        | <input type="radio"/> |
| APTT (seconds)                        |        | <input type="radio"/> | CRP (mg/L)            |        | <input type="radio"/> |
| APTR                                  |        | <input type="radio"/> | LDH (U/L)             |        | <input type="radio"/> |
| PT (seconds)                          |        | <input type="radio"/> | Creatine kinase (U/L) |        | <input type="radio"/> |
| INR                                   |        | <input type="radio"/> | Troponin I (ng/mL)    |        | <input type="radio"/> |
| ALT/SGPT (U/L)                        |        | <input type="radio"/> | D-dimer (mg/L)        |        | <input type="radio"/> |
| Total bilirubin (µmol/L)              |        | <input type="radio"/> | Ferritin (ng/mL)      |        | <input type="radio"/> |
| AST/SGOT (U/L)                        |        | <input type="radio"/> | IL-6 (pg/mL)          |        | <input type="radio"/> |
| Glucose (mmol/L)                      |        | <input type="radio"/> |                       |        |                       |

### MODULE 3: OUTCOME CASE REPORT FORM

**TREATMENT: At ANY time during hospitalisation, did the patient receive/undergo:**
**Any Oxygen therapy?**  YES  NO  Unknown      **If YES, total duration:** \_\_\_\_\_ days  Unknown

**Maximum O<sub>2</sub> flow volume:**  <2 L/min  2-5 L/min  6-10 L/min  11-15 L/min  >15 L/min

**Non-invasive ventilation? (Any)**  YES  NO  Unknown      **If YES, total duration:** \_\_\_\_\_ days  Unknown

**Invasive ventilation? (Any)**  YES  NO  Unknown      **If YES, total duration:** \_\_\_\_\_ days  Unknown

**Prone Positioning?**  YES  NO  Unknown      **If YES, total duration:** \_\_\_\_\_ days  Unknown

**Inhaled Nitric Oxide?**  YES  NO  Unknown

**Tracheostomy inserted?**  YES  NO  Unknown

**Extracorporeal support (ECMO)?**  YES  NO  Unknown      **If YES, total duration:** \_\_\_\_\_ days  Unknown

**Renal replacement therapy (RRT) or dialysis?**  YES  NO  Unknown

**Inotropes/vasopressors?**  YES  NO  Unknown      **If YES, total duration:** \_\_\_\_\_ days  Unknown

**ICU or High Dependency Unit admission?**  YES  NO  Unknown      **If YES, total duration:** \_\_\_\_\_ days  Unknown

**If YES, date of ICU admission:** [ \_ ] [ \_ ] / [ \_ ] [ \_ ] / [ \_ ] [ \_ ] [ \_ ] [ \_ ]  Unknown

**date of ICU discharge:** [ \_ ] [ \_ ] / [ \_ ] [ \_ ] / [ \_ ] [ \_ ] [ \_ ] [ \_ ]  Unknown

**COMPLICATIONS: At any time during hospitalisation did the patient experience: (Unk = Unknown)**

|                                                                                                                                   |                                                                              |                                         |                                                                              |
|-----------------------------------------------------------------------------------------------------------------------------------|------------------------------------------------------------------------------|-----------------------------------------|------------------------------------------------------------------------------|
| Viral pneumonia/pneumonitis                                                                                                       | <input type="radio"/> YES <input type="radio"/> NO <input type="radio"/> Unk | Stroke / Cerebrovascular accident       | <input type="radio"/> YES <input type="radio"/> NO <input type="radio"/> Unk |
| Bacterial pneumonia                                                                                                               | <input type="radio"/> YES <input type="radio"/> NO <input type="radio"/> Unk | Meningitis / Encephalitis               | <input type="radio"/> YES <input type="radio"/> NO <input type="radio"/> Unk |
| Acute Respiratory Distress Syndrome                                                                                               | <input type="radio"/> YES <input type="radio"/> NO <input type="radio"/> Unk | Bacteremia                              | <input type="radio"/> YES <input type="radio"/> NO <input type="radio"/> Unk |
| If YES, specify: <input type="radio"/> Mild <input type="radio"/> Moderate <input type="radio"/> Severe <input type="radio"/> Unk |                                                                              | Coagulation disorder / DIC              | <input type="radio"/> YES <input type="radio"/> NO <input type="radio"/> Unk |
| Pneumothorax                                                                                                                      | <input type="radio"/> YES <input type="radio"/> NO <input type="radio"/> Unk | Pulmonary embolism                      | <input type="radio"/> YES <input type="radio"/> NO <input type="radio"/> Unk |
| Pleural effusion                                                                                                                  | <input type="radio"/> YES <input type="radio"/> NO <input type="radio"/> Unk | Anemia                                  | <input type="radio"/> YES <input type="radio"/> NO <input type="radio"/> Unk |
| Cryptogenic organizing pneumonia (COP)                                                                                            | <input type="radio"/> YES <input type="radio"/> NO <input type="radio"/> Unk | Rhabdomyolysis / Myositis               | <input type="radio"/> YES <input type="radio"/> NO <input type="radio"/> Unk |
| Bronchiolitis                                                                                                                     | <input type="radio"/> YES <input type="radio"/> NO <input type="radio"/> Unk | Acute renal injury/ Acute renal failure | <input type="radio"/> YES <input type="radio"/> NO <input type="radio"/> Unk |
| Cardiac arrest                                                                                                                    | <input type="radio"/> YES <input type="radio"/> NO <input type="radio"/> Unk | Gastrointestinal haemorrhage            | <input type="radio"/> YES <input type="radio"/> NO <input type="radio"/> Unk |
| Myocardial infarction                                                                                                             | <input type="radio"/> YES <input type="radio"/> NO <input type="radio"/> Unk | Pancreatitis                            | <input type="radio"/> YES <input type="radio"/> NO <input type="radio"/> Unk |
| Cardiac ischaemia                                                                                                                 | <input type="radio"/> YES <input type="radio"/> NO <input type="radio"/> Unk | Liver dysfunction                       | <input type="radio"/> YES <input type="radio"/> NO <input type="radio"/> Unk |
| Cardiac arrhythmia                                                                                                                | <input type="radio"/> YES <input type="radio"/> NO <input type="radio"/> Unk | Hyperglycemia                           | <input type="radio"/> YES <input type="radio"/> NO <input type="radio"/> Unk |
| Myocarditis / Pericarditis                                                                                                        | <input type="radio"/> YES <input type="radio"/> NO <input type="radio"/> Unk | Hypoglycemia                            | <input type="radio"/> YES <input type="radio"/> NO <input type="radio"/> Unk |
| Endocarditis                                                                                                                      | <input type="radio"/> YES <input type="radio"/> NO <input type="radio"/> Unk | Other<br><br>If YES specify:            |                                                                              |
| Cardiomyopathy                                                                                                                    | <input type="radio"/> YES <input type="radio"/> NO <input type="radio"/> Unk |                                         |                                                                              |
| Congestive heart failure                                                                                                          | <input type="radio"/> YES <input type="radio"/> NO <input type="radio"/> Unk |                                         |                                                                              |
| Seizure                                                                                                                           | <input type="radio"/> YES <input type="radio"/> NO <input type="radio"/> Unk |                                         |                                                                              |

**MODULE 3: OUTCOME CASE REPORT FORM**
**DIAGNOSTICS**

**Was patient clinically diagnosed with COVID-19?**  YES  NO  Unknown  
**Was pathogen testing done during this illness episode?**  YES (*complete section*)  NO  Unknown  
**Coronavirus:**  Positive  Negative  Not done **If Positive:**  COVID-2019/ SARS-CoV2  MERS CoV  
 Other CoV: \_\_\_\_\_  Unknown  
**Influenza :**  Positive  Negative  Not done **If Positive:**  A/H3N2  A/H1N1pdm09  A/H7N9  A/H5N1  A-not typed  B  
 Other: \_\_\_\_\_  Unknown  
**RSV:**  Positive  Negative  Not done  
**Adenovirus:**  Positive  Negative  Not done  
**Bacteria:**  Positive  Negative  Not done **If Positive, specify:** \_\_\_\_\_  Unknown  
**Other pathogen/s detected:**  YES  NO  Unknown **If YES, specify all:** \_\_\_\_\_  Unknown  
 \*\*\*\*\*  
**Clinical pneumonia diagnosed?**  YES  NO  Unknown  
**Chest X-Ray performed?**  YES  NO  Unknown **If Yes: Were infiltrates present?**  YES  NO  Unknown  
**CT performed?**  YES  NO  Unknown **If Yes: Were infiltrates present?**  YES  NO  Unknown

| Collection Date<br>(DD/MM/YYYY)         | Biospecimen Type                                                                                                                                                                                                                                                                                                                                                      | Laboratory test Method                                                                                    | Result                                                                                            | Pathogen Tested/Detected |
|-----------------------------------------|-----------------------------------------------------------------------------------------------------------------------------------------------------------------------------------------------------------------------------------------------------------------------------------------------------------------------------------------------------------------------|-----------------------------------------------------------------------------------------------------------|---------------------------------------------------------------------------------------------------|--------------------------|
| _ D _ D / _ M _ M / 20 _ Y _ Y<br>_____ | <input type="radio"/> Nasal/NP swab <input type="radio"/> Throat swab<br><input type="radio"/> Combined nasal/NP+throat swab<br><input type="radio"/> Sputum <input type="radio"/> BAL <input type="radio"/> ETA <input type="radio"/> Urine<br><input type="radio"/> Feces/rectal swab <input type="radio"/> Blood<br><input type="radio"/> Other, Specify: _____    | <input type="radio"/> PCR<br><input type="radio"/> Culture<br><input type="radio"/> Other, Specify: _____ | <input type="radio"/> Positive<br><input type="radio"/> Negative<br><input type="radio"/> Unknown | _____<br>_____           |
| _ D _ D / _ M _ M / 20 _ Y _ Y<br>_____ | <input type="radio"/> Nasal/NP swab <input type="radio"/> Throat swab<br><input type="radio"/> Combined nasal/NP+throat swab<br><input type="radio"/> Sputum <input type="radio"/> BAL <input type="radio"/> ETA <input type="radio"/> Urine<br><input type="radio"/> Feces/rectal swab <input type="radio"/> Blood<br><input type="radio"/> Other, Specify: _____    | <input type="radio"/> PCR<br><input type="radio"/> Culture<br><input type="radio"/> Other, Specify: _____ | <input type="radio"/> Positive<br><input type="radio"/> Negative<br><input type="radio"/> Unknown | _____<br>_____           |
| _ D _ D / _ M _ M / 20 _ Y _ Y<br>_____ | <input type="radio"/> Nasal/NP swab <input type="radio"/> Throat swab<br><input type="radio"/> Combined nasal/NP+throat swab<br><input type="radio"/> Sputum <input type="radio"/> BAL <input type="radio"/> ETA <input type="radio"/> Urine<br><input type="radio"/> Feces/rectal swab <input type="radio"/> Blood<br><input type="radio"/> Other, Specify: _____    | <input type="radio"/> PCR<br><input type="radio"/> Culture<br><input type="radio"/> Other, Specify: _____ | <input type="radio"/> Positive<br><input type="radio"/> Negative<br><input type="radio"/> Unknown | _____<br>_____           |
| _ D _ D / _ M _ M / 20 _ Y _ Y<br>_____ | <input type="radio"/> Nasal/NP swab <input type="radio"/> Throat swab<br><input type="radio"/> Combined nasal/NP+throat swab<br><input type="radio"/> Sputum <input type="radio"/> BAL <input type="radio"/> ETA <input type="radio"/> Urine<br><input type="radio"/> Faeces/rectal swab <input type="radio"/> Blood<br><input type="radio"/> Other, Specify: _____   | <input type="radio"/> PCR<br><input type="radio"/> Culture<br><input type="radio"/> Other, Specify: _____ | <input type="radio"/> Positive<br><input type="radio"/> Negative<br><input type="radio"/> Unknown | _____<br>_____           |
| _ D _ D / _ M _ M / 20 _ Y _ Y<br>_____ | <input type="radio"/> Nasal/NP swab <input type="radio"/> Throat swab<br><input type="radio"/> Combined nasal/NP+throat swab<br><input type="radio"/> Sputum <input type="radio"/> BAL <input type="radio"/> ETA <input type="checkbox"/> Urine<br><input type="radio"/> Feces/rectal swab <input type="radio"/> Blood<br><input type="radio"/> Other, Specify: _____ | <input type="radio"/> PCR<br><input type="radio"/> Culture<br><input type="radio"/> Other, Specify: _____ | <input type="radio"/> Positive<br><input type="radio"/> Negative<br><input type="radio"/> Unknown | _____<br>_____           |



**MODULE 3: OUTCOME CASE REPORT FORM**

| <b>MEDICATION: While hospitalised or at discharge, were any of the following administered? (Unk=Unknown)</b>                                                                                                                                          |                                                                                                                   |
|-------------------------------------------------------------------------------------------------------------------------------------------------------------------------------------------------------------------------------------------------------|-------------------------------------------------------------------------------------------------------------------|
| <b>Antiviral or COVID-19 targeted agent? <input type="radio"/> YES <input type="radio"/> NO <input type="radio"/> Unknown If YES, specify all agents and duration:</b>                                                                                |                                                                                                                   |
| <input type="checkbox"/> Ribavirin                                                                                                                                                                                                                    | Date commenced [ _ ] [ _ ] / [ _ ] [ _ ] / [ 2 ] [ 0 ] [ _ ] [ _ ] Duration: _____ days <input type="radio"/> Unk |
| <input type="checkbox"/> Lopinavir/Ritonavir                                                                                                                                                                                                          | Date commenced [ _ ] [ _ ] / [ _ ] [ _ ] / [ 2 ] [ 0 ] [ _ ] [ _ ] Duration: _____ days <input type="radio"/> Unk |
| <input type="checkbox"/> Remdesivir                                                                                                                                                                                                                   | Date commenced [ _ ] [ _ ] / [ _ ] [ _ ] / [ 2 ] [ 0 ] [ _ ] [ _ ] Duration: _____ days <input type="radio"/> Unk |
| <input type="checkbox"/> Interferon alpha                                                                                                                                                                                                             | Date commenced [ _ ] [ _ ] / [ _ ] [ _ ] / [ 2 ] [ 0 ] [ _ ] [ _ ] Duration: _____ days <input type="radio"/> Unk |
| <input type="checkbox"/> Interferon beta                                                                                                                                                                                                              | Date commenced [ _ ] [ _ ] / [ _ ] [ _ ] / [ 2 ] [ 0 ] [ _ ] [ _ ] Duration: _____ days <input type="radio"/> Unk |
| <input type="checkbox"/> Chloroquine/hydroxychloroquine                                                                                                                                                                                               | Date commenced [ _ ] [ _ ] / [ _ ] [ _ ] / [ 2 ] [ 0 ] [ _ ] [ _ ] Duration: _____ days <input type="radio"/> Unk |
| <input type="checkbox"/> Other _____                                                                                                                                                                                                                  | Date commenced [ _ ] [ _ ] / [ _ ] [ _ ] / [ 2 ] [ 0 ] [ _ ] [ _ ] Duration: _____ days <input type="radio"/> Unk |
| *****                                                                                                                                                                                                                                                 |                                                                                                                   |
| <b>Antibiotic? <input type="radio"/> YES <input type="radio"/> NO <input type="radio"/> Unk If yes, specify all:</b>                                                                                                                                  |                                                                                                                   |
| Agent: _____                                                                                                                                                                                                                                          | Date commenced [ _ ] [ _ ] / [ _ ] [ _ ] / [ 2 ] [ 0 ] [ _ ] [ _ ] Duration: _____ days <input type="radio"/> Unk |
| Agent: _____                                                                                                                                                                                                                                          | Date commenced [ _ ] [ _ ] / [ _ ] [ _ ] / [ 2 ] [ 0 ] [ _ ] [ _ ] Duration: _____ days <input type="radio"/> Unk |
| Agent: _____                                                                                                                                                                                                                                          | Date commenced [ _ ] [ _ ] / [ _ ] [ _ ] / [ 2 ] [ 0 ] [ _ ] [ _ ] Duration: _____ days <input type="radio"/> Unk |
| *****                                                                                                                                                                                                                                                 |                                                                                                                   |
| <b>Corticosteroid? <input type="radio"/> YES <input type="radio"/> NO <input type="radio"/> Unk If YES, Route: <input type="checkbox"/> Oral <input type="checkbox"/> Intravenous (IV) <input type="checkbox"/> Inhaled <input type="radio"/> Unk</b> |                                                                                                                   |
| If YES Oral or IV, please provide agent: _____ and max. daily dose & unit: _____                                                                                                                                                                      |                                                                                                                   |
| Date commenced [ _ ] [ _ ] / [ _ ] [ _ ] / [ 2 ] [ 0 ] [ _ ] [ _ ] <input type="radio"/> Unk                                                                                                                                                          | Duration: _____ days <input type="radio"/> Unk                                                                    |
| *****                                                                                                                                                                                                                                                 |                                                                                                                   |
| <b>Heparin? <input type="radio"/> YES <input type="radio"/> NO <input type="radio"/> Unk If YES, Route: <input type="checkbox"/> Subcutaneous <input type="checkbox"/> Intravenous (IV) <input type="radio"/> Unk</b>                                 |                                                                                                                   |
| If YES: <input type="checkbox"/> Unfractionated <input type="checkbox"/> Low molecular weight <input type="checkbox"/> Fondaparinux <input type="radio"/> Unk                                                                                         | Maximum daily dose & unit: _____                                                                                  |
| Date commenced [ _ ] [ _ ] / [ _ ] [ _ ] / [ 2 ] [ 0 ] [ _ ] [ _ ] <input type="radio"/> Unk                                                                                                                                                          | Duration: _____ days <input type="radio"/> Unk                                                                    |
| *****                                                                                                                                                                                                                                                 |                                                                                                                   |
| <b>Antifungal agent? <input type="radio"/> YES <input type="radio"/> NO <input type="radio"/> Unk</b>                                                                                                                                                 |                                                                                                                   |
| *****                                                                                                                                                                                                                                                 |                                                                                                                   |
| <b>Other treatments administered for COVID-19 including experimental or compassionate use? <input type="radio"/> YES <input type="radio"/> NO <input type="radio"/> Unk</b>                                                                           |                                                                                                                   |
| If yes, specify agent, maximum daily does and duration:                                                                                                                                                                                               |                                                                                                                   |
| Agent: _____                                                                                                                                                                                                                                          | Maximum daily dose & unit: _____ <input type="radio"/> Unk                                                        |
| Date of commencement [ _ ] [ _ ] / [ _ ] [ _ ] / [ 2 ] [ 0 ] [ _ ] [ _ ] <input type="radio"/> Unk                                                                                                                                                    | Duration: _____ days <input type="radio"/> Unk                                                                    |
| Agent: _____                                                                                                                                                                                                                                          | Maximum daily dose & unit: _____ <input type="radio"/> Unk                                                        |
| Date of commencement [ _ ] [ _ ] / [ _ ] [ _ ] / [ 2 ] [ 0 ] [ _ ] [ _ ] <input type="radio"/> Unk                                                                                                                                                    | Duration: _____ days <input type="radio"/> Unk                                                                    |

| <b>OUTCOME</b>                                                                                                                                                                                                                                  |
|-------------------------------------------------------------------------------------------------------------------------------------------------------------------------------------------------------------------------------------------------|
| <b>Outcome:</b> <input type="radio"/> Discharged alive <input type="radio"/> Hospitalised <input type="radio"/> Transfer to other facility <input type="radio"/> Death <input type="radio"/> Palliative discharge <input type="radio"/> Unknown |
| <b>Outcome date:</b> [ _ ] [ _ ] / [ _ ] [ _ ] / [ 2 ] [ 0 ] [ _ ] [ _ ] <input type="radio"/> Unknown                                                                                                                                          |
| <b>If Discharged alive:</b>                                                                                                                                                                                                                     |
| Ability to self-care at discharge versus before illness: <input type="radio"/> Same as before illness <input type="radio"/> Worse <input type="radio"/> Better <input type="radio"/> Unknown                                                    |
| Post-discharge treatment: Oxygen therapy? <input type="radio"/> YES <input type="radio"/> NO <input type="radio"/> Unknown                                                                                                                      |
